# Supplementary material for: Lamivudine and Entecavir for Acute Hepatitis B: A Systematic Review and Meta-Analysis
Source: MDPI journal article supplement (doi:10.3390/v15112241), 2023-11-10
Supplement: s1 [file s1]

## Supplementary Materials

Table S1. Searching strategy

| Pubmed (OVID)                                                                                                                                                                                                                                                                             | EMBASE                                                                                                                                                                                                                                                                    |
|-------------------------------------------------------------------------------------------------------------------------------------------------------------------------------------------------------------------------------------------------------------------------------------------|---------------------------------------------------------------------------------------------------------------------------------------------------------------------------------------------------------------------------------------------------------------------------|
| <ol style="list-style-type: none"><li>1. exp Hepatitis B</li><li>2. acute.tw.</li><li>3. 1 and 2</li><li>4. randomized controlled trial.pt.</li><li>5. controlled clinical trial.pt.</li><li>6. lamivudine</li><li>7. nucleoside</li><li>8. 4 or 5 or 6 or 7</li><li>9. 3 and 8</li></ol> | <ol style="list-style-type: none"><li>1. hepatitis B</li><li>2. acute</li><li>3. 1 and 2</li><li>4. randomized controlled trial</li><li>5. controlled clinical trial</li><li>6. lamivudine</li><li>7. nucleoside</li><li>8. 4 or 5 or 6 or 7</li><li>9. 3 and 8</li></ol> |

Table S2. Summary of findings for the main comparison. Lamivudine vs no intervention for acute hepatitis B virus infection

Lamivudine compared to standard of care for acute hepatitis B infection. **Setting: inpatients**

| Certainty assessment |                   |              |               |              |             |                      | № of patients   |                  | Effect                    |                                                    | Certainty                                                                                         |
|----------------------|-------------------|--------------|---------------|--------------|-------------|----------------------|-----------------|------------------|---------------------------|----------------------------------------------------|---------------------------------------------------------------------------------------------------|
| № of studies         | Study design      | Risk of bias | Inconsistency | Indirectness | Imprecision | Other considerations | lamivudine      | standard of care | Relative (95% CI)         | Absolute (95% CI)                                  |                                                                                                   |
| Undetectable HBV DNA |                   |              |               |              |             |                      |                 |                  |                           |                                                    |                                                                                                   |
| 5                    | randomised trials | serious      | serious       | not serious  | not serious | none                 | 148/173 (85.5%) | 192/223 (86.1%)  | OR 0.96<br>(0.54 to 1.70) | 5 fewer per 1000<br>(from 91 fewer to 52 more)     |  1, 2<br>Low   |
| Seroconversion HBsAg |                   |              |               |              |             |                      |                 |                  |                           |                                                    |                                                                                                   |
| 5                    | randomised trials | serious      | serious       | not serious  | not serious | none                 | 95/173 (54.9%)  | 136/223 (61.0%)  | OR 0.54<br>(0.33 to 0.90) | 152 fewer per 1000<br>(from 270 fewer to 25 fewer) |  1, 2<br>Low   |
| Mortality            |                   |              |               |              |             |                      |                 |                  |                           |                                                    |                                                                                                   |
| 4                    | randomised trials | serious      | serious       | not serious  | not serious | none                 | 7/158 (4.4%)    | 15/207 (7.2%)    | OR 0.54<br>(0.21 to 1.36) | 32 fewer per 1000<br>(from 56 fewer to 24 more)    |  1, 2<br>Low |

CI: confidence interval; OR: odds ratio; HBV: Hepatitis B Virus; HBsAg: Hepatitis B surface Antigen; SOC: Standard of Care

GRADE Working Group grades of evidence

**High quality:** Further research is very unlikely to change our confidence in the estimate of effect.

**Moderate quality:** Further research is likely to have an important impact on our confidence in the estimate of effect and may change the estimate.

**Low quality:** Further research is very likely to have an important impact on our confidence in the estimate of effect and is likely to change the estimate.

**Very low quality:** We are very uncertain about the estimate.

<sup>1</sup> The risk of bias in the trials was high (downgraded by 1 level for risk of bias).

<sup>2</sup> Moderate heterogeneity in results across studies (downgrade the quality of evidence for this outcome by 1 level).

Table S3. Summary of findings. Entecavir vs Lamivudine for acute hepatitis B virus infection

Entecavir compared to Lamivudine for acute hepatitis B infection **Setting:** inpatients

| Certainty assessment |                   |              |               |              |             |                      | № of patients |               | Effect                     |                                                    | Certainty                                                                                       |  |
|----------------------|-------------------|--------------|---------------|--------------|-------------|----------------------|---------------|---------------|----------------------------|----------------------------------------------------|-------------------------------------------------------------------------------------------------|--|
| № of studies         | Study design      | Risk of bias | Inconsistency | Indirectness | Imprecision | Other considerations | [Entecavir]   | [Lamivudine]  | Relative (95% CI)          | Absolute (95% CI)                                  |                                                                                                 |  |
| Seroconversion HBsAg |                   |              |               |              |             |                      |               |               |                            |                                                    |                                                                                                 |  |
| 1                    | randomised trials | serious      | not serious   | not serious  | not serious | none                 | 16/69 (23.2%) | 11/21 (52.4%) | OR 3.64<br>(1.31 to 10.13) | 276 more per 1,000<br>(from 67 more to 394 more)   | <br>Moderate |  |
| Reduction viral load |                   |              |               |              |             |                      |               |               |                            |                                                    |                                                                                                 |  |
| 1                    | randomised trials | serious      | not serious   | not serious  | not serious | none                 | 14/21 (66.7%) | 56/69 (81.2%) | OR 0.46<br>(0.16 to 1.38)  | 147 fewer per 1,000<br>(from 404 fewer to 44 more) | <br>Moderate |  |

CI: confidence interval; OR: odds ratio; HBsAg: Hepatitis B surface Antigen

<sup>1</sup> The risk of bias in the trials was high (downgraded by 1 level for risk of bias).

Table S4. Summary of findings. Entecavir vs no intervention for acute hepatitis B virus infection

Entecavir compared to standard of care for acute hepatitis B infection **Setting:** inpatients

| Certainty assessment  |                   |              |               |              |             |                      | № of patients |                    | Effect                    |                                                     | Certainty                                                                                       |  |
|-----------------------|-------------------|--------------|---------------|--------------|-------------|----------------------|---------------|--------------------|---------------------------|-----------------------------------------------------|-------------------------------------------------------------------------------------------------|--|
| № of studies          | Study design      | Risk of bias | Inconsistency | Indirectness | Imprecision | Other considerations | [Entecavir]   | [standard of care] | Relative (95% CI)         | Absolute (95% CI)                                   |                                                                                                 |  |
| Seroconversion HBVsAg |                   |              |               |              |             |                      |               |                    |                           |                                                     |                                                                                                 |  |
| 1                     | randomised trials | serious      | not serious   | not serious  | not serious | none                 | 11/21 (52.4%) | 43/110 (39.1%)     | OR 1.71<br>(0.67 to 4.38) | 132 more per 1,000<br>(from 90 fewer to 347 more)   | <br>Moderate |  |
| Reduction viral load  |                   |              |               |              |             |                      |               |                    |                           |                                                     |                                                                                                 |  |
| 1                     | randomised trials | serious      | not serious   | not serious  | not serious | none                 | 11/21 (52.4%) | 102/110 (92.7%)    | OR 0.16<br>(0.05 to 0.50) | 256 fewer per 1,000<br>(from 538 fewer to 63 fewer) | <br>Moderate |  |

CI: confidence interval; OR: odds ratio; HBsAg: Hepatitis B surface Antigen

<sup>1</sup> The risk of bias in the trials was high (downgraded by 1 level for risk of bias).
